# Supplementary material
Source: PubMed Central journal article supplement (PMC5846193)
Supplement: NIHMS946565-supplement-supplement_1.pdf [file NIHMS946565-supplement-supplement_1.pdf]

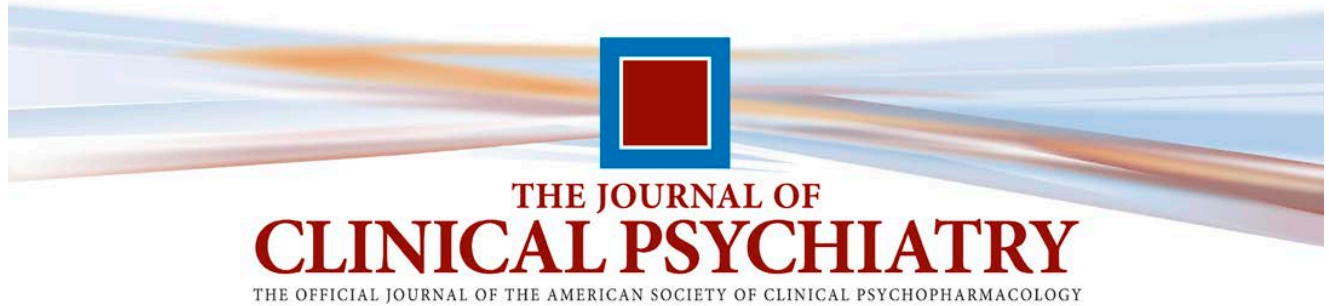

## **Supplementary Material**

**Article Title:** Consensus Recommendations for the Clinical Application of Repetitive Transcranial Magnetic Stimulation (rTMS) in the Treatment of Depression

**Author(s):** Shawn M. McClintock, PhD, MSCS; Irving M. Reti, MBBS; Linda L. Carpenter, MD; William M. McDonald, MD; Marc Dubin, MD, PhD; Stephan F. Taylor, MD; Ian A. Cook, MD; John O'Reardon, MD; Mustafa M. Husain, MD; Christopher Wall, MD; Andrew Krystal, MD; Shirlene Sampson, MD; Oscar Morales, MD; Brent G. Nelson, MD; Vassilios Latoussakis, MD; Mark S. George, MD; and Sarah H. Lisanby, MD, on behalf of both the National Network of Depression Centers rTMS Task Group and the American Psychiatric Association Council on Research Task Force on Novel Biomarkers and Treatments

**DOI Number:** <https://doi.org/10.4088/JCP.16cs10905>

### **List of Supplementary Material for the article**

1. [eFigure 1](#) PRISMA Flowchart of Publications

### **Disclaimer**

This Supplementary Material has been provided by the author(s) as an enhancement to the published article. It has been approved by peer review; however, it has undergone neither editing nor formatting by in-house editorial staff. The material is presented in the manner supplied by the author.

© Copyright 2017 Physicians Postgraduate Press, Inc.

It is illegal to post this copyrighted PDF on any website. ♦ © 2017 Copyright Physicians Postgraduate Press, Inc.

Identification      Screening / Eligibility      Included

Number of records identified through database searching: 1,500  
Databases searched  
MEDLINE: 617  
PsychINFO: 883

Additional records identified through author and reviewer recommendations: 45

Number of records screened after removing duplicates: 1,126

Number of excluded abstracts: 361

Number of full text records assessed for eligibility: 765

Number of full-text records excluded: 647

Reasons for exclusion  
Wrong population: 206  
Wrong publication type: 124  
Wrong treatment: 317

Number of articles included in the consensus recommendations: 118
